# Supplementary material for: Collaborative regulation strategy of donor and acceptor analogues realizes multifunctional semitransparent organic solar cells with excellent comprehensive performance
Source: Royal Society of Chemistry journal article supplement (doi:10.1039/d3ee04476a), 2024-01-01
Supplement: d3ee04476a1.pdf [file d3ee04476a1.pdf]

## Supporting Information

Xuexiang Huang<sup>a,b,1</sup>, Xinyuan Ren<sup>a,1</sup>, Yujun Cheng<sup>a</sup>, Youhui Zhang<sup>a</sup>, Zhe Sun<sup>c</sup>, Sangjin Yang<sup>c</sup>, Seoyoung Kim<sup>c</sup>, Changduk Yang<sup>c</sup>, Feiyan Wu<sup>a</sup> and Lie Chen<sup>a,\*</sup>

<sup>a</sup> *College of Chemistry and Chemical Engineering / Institute of Polymers and Energy Chemistry (IPEC), Nanchang University, Nanchang 330031, Jiangxi, China.*

<sup>b</sup> *College of Intelligent Manufacturing and Materials Engineering, Gannan University of Science and Technology, 156 Kejia Avenue, Ganzhou 341000, Jiangxi, China.*

<sup>c</sup> *Department of Energy Engineering, School of Energy and Chemical Engineering, Perovtronics Research Center, Low Dimensional Carbon Materials Center, Ulsan National Institute of Science and Technology (UNIST), 50 UNIST-gil, Ulju-gun, Ulsan 44919, South Korea.*

**\*Corresponding authors.**

*Email addresses:* chenlie@ncu.edu.cn (L. Chen)

<sup>1</sup> These authors contributed equally to this work.

### 1. Materials and Measurements

**Materials:** PCE10-2F were synthesized in our previous work, PCE10-2F has a molecular weight of 58.8 kDa, Y5, Y6, L8-BO and PM6 were purchased from Derthon Optoelectronic Materials Science Technology Co LTD (Shenzhen, China). All reagents and commercially available compounds are used upon receipt.

#### Measurements

Optical absorption spectra of the polymers were measured on a PerkinElmer model Lambda 900 UV-vis/near-IR spectrophotometer. Solution and solid-state absorption spectra were obtained from dilute ( $10^{-6}$  M) polymer solution in chloroform and from

thin films on glass substrate, respectively. Thin films were spin coated from 20 mg/mL solutions in chloroform.

The specimen for atomic force microscopy (AFM) measurements was prepared using the same procedures those for fabricating devices but without PDINO/Ag on top of the active layer. Transmission electron microscope (TEM) images were taken on a JEOL-2100F transmission electron microscope and an internal charge-coupled device (CCD) camera. The specimen for TEM measurement was prepared by spin casting the blend solution on ITO/PEDOT: PSS substrate, then floating the film on a water surface, and transferring to TEM grids.

The GIWAXS measurement was carried out at the PLS-II 6A U-SAXS beamline of the Pohang Accelerator Laboratory in Korea. The X-rays coming from the in-vacuum undulator (IVU) were monochromated (wavelength  $\lambda = 1.10994 \text{ \AA}$ ) using a double crystal monochromator and focused both horizontally and vertically ( $450 \text{ (H)} \times 60 \text{ (V)} \text{ \mu m}^2$  in FWHM @ the sample position) using K-B type mirrors. The grazing incidence wide-angle X-ray scattering (GIWAXS) sample stage was equipped with a 7-axis motorized stage for the fine alignment of the sample, and the incidence angles of the X-ray beam were set to be  $0.11^\circ$ - $0.13^\circ$  for the neat and blend films. The GIWAXS patterns were recorded with a 2D CCD detector (Rayonix SX165) and an X-ray irradiation time within 100 s, dependent on the saturation level of the detector. Diffraction angles were calibrated using a sucrose standard (monoclinic, P21,  $a=10.8631 \text{ \AA}$ ,  $b = 8.7044 \text{ \AA}$ ,  $c=7.7624 \text{ \AA}$ , and  $\beta=102.938 \text{ \AA}$ ) and the sample-to-detector distance was  $\sim 231 \text{ mm}$ .

Solar cell characterization: The current density-voltage ( $J$ - $V$ ) curves of OSCs were measured in the glovebox with Keithley 2400, under AM 1.5G illumination at  $100 \text{ mW cm}^{-2}$  irradiation using an Enli SS-F5-3A solar simulator, and the light intensity was calibrated with a standard Si solar cell with KG2 filter (made by Enli Technology Co., Ltd., Taiwan, and calibrated report can be traced to NREL). The EQE spectrum was measured using a QE-R Solar Cell Spectral Response Measurement System (Enli Technology Co., Ltd., Taiwan).

## **2. Device fabrication**

## 2.1 Opaque device fabrication

The device is fabricated with ITO/PEDOT:PSS/active layer/PDINO/Ag tradition structure. The ITO coated glass substrates were cleaned by ultrasound for 15 minutes in sequence in water/detergent, water, acetone and isopropanol, and then treated in ultraviolet-ozone for 1400 seconds. The PEDOT:PSS solution was spin-coated on top of the cleaned ITO-coated glass substrate and the PEDOT:PSS film thickness was approximately 25 nm. After annealing at 150 °C for 20 min, then the substrates were transferred into a glove box. For the solar cells based on NBG system, PCE10-2F or (PCE10-2F+DA, 1:0.2) with a concentration of 8 mg mL<sup>-1</sup> in CF were spun onto the PEDOT: PSS layers at 2500 rpm (60 nm) for 40 s form the front layer, Y6 and (Y6:Y5, 1:0.1) with a concentration of 10 mg mL<sup>-1</sup> in CF, and 1,8-diiodooctane (DIO) and CN was added (volume ratio 0.25% and 0.25%, respectively). then spun onto the PCE10-2F layers at 2300 rpm (40nm) for 40 s. After annealing at 100 °C for 10 min. For the solar cells based on WBG system, The PM6: acceptors active layers (D:A = 1:1.2) weight ratio for binary, The DA:PM6: L8-BO:Y5 active layers (D:A = 0.25:1:1.1:0.1) weight ratio for quaternary, were then spin-coated from 16.5 mg/mL chloroform solution with 0.3 vol.% 1,8-diiodooctane (DIO) for PM6:L8-BO binary blend and DA:PM6: L8-BO:Y5 quaternary active layers, at 3000 rpm for the 30s to form an active layer of around 100 nm. The PDINO was dissolved in methanol at 3 mg mL<sup>-1</sup> and spin-coated on active layer at 3000 rpm for 30s. Finally, 90-nanometer thick Ag layers were deposited on the active layer under high vacuum of  $\sim 3 \times 10^{-4}$  Pa. The overlapping area of cathode and anode was 4 square millimeters. J-V curves of devices based on polymer doner: Y6 were measured under the standard AM 1.5G spectrum of 100 MW cm<sup>-2</sup>. **Semitransparent device fabrication** was fabricated by following the same procedure. 15nm or 25nm thickness Ag and layers were deposited on the active layer under high vacuum of  $\sim 3 \times 10^{-4}$  Pa. Then, MoO<sub>3</sub> (35 nm) were evaporated onto the surface of Ag. The overlapping area of cathode and anode was 4 square millimeters. J-V curves of ST-OSC devices were measured under the standard AM 1.5G spectrum of 100 MW cm<sup>-2</sup>.

Electroluminescence (EL) quantum efficiency (EQE<sub>EL</sub>) measurements were performed by applying external voltage sources through the devices from 1V to 4V. A

Keithley 2400 SourceMeter was used for supplying voltages and recording injected current, and a Keithley 485 picoammeter was used for measuring the emitted light intensity.

### 3. Optical Characterization

The average visible transmittance (AVT) is calculated using

$$VLT = \frac{\int T(\lambda)P(\lambda)S(\lambda)d(\lambda)}{\int P(\lambda)S(\lambda)d(\lambda)} \quad VLT = \frac{\int T(\lambda)P(\lambda)S(\lambda)d(\lambda)}{\int P(\lambda)S(\lambda)d(\lambda)}$$

$$AVT = \frac{\int T(\lambda)V(\lambda)S(\lambda)d(\lambda)}{\int P(\lambda)S(\lambda)d(\lambda)} \quad (\text{Eq. S1})$$

where  $\lambda$  is the wavelength, T is the transmission, V is the normalized photopic spectral response of the eye, and S is the solar photon flux (AM1.5G). It is estimated by taking the average of the transparency of the devices in the visible region (380-740 nm) based on the photonic response of the human eye.

Infrared photon rejection rate (IRR) is defined as:

$$IRR = 1 - \frac{\int T(\lambda)S(\lambda)d\lambda}{\int S(\lambda)d\lambda}$$

where T is the transmittance, S is the solar photon flux, and  $\lambda$  is the wavelength.

All the photographs are taken by Apple iPhone13 Pro.

### 4. Thermal Insulation Performance Test

The model of the infrared heater is Philips PAR38E, the power is 150W, and the irradiation distance is 25cm.

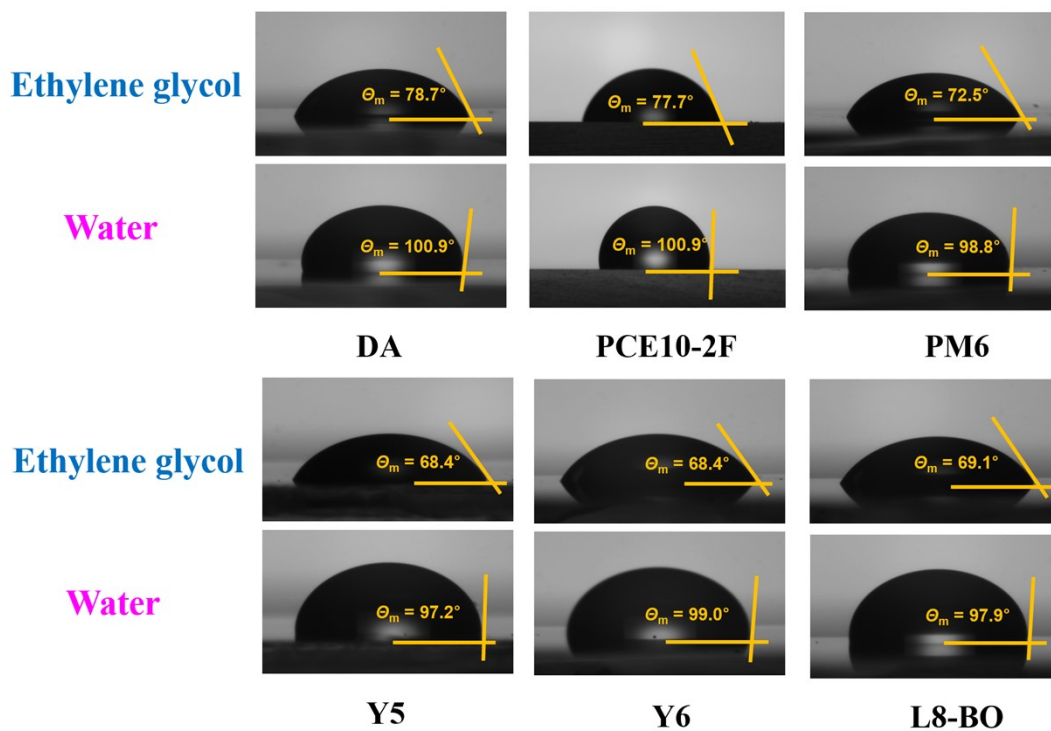

**Figure S1.** Contact angle images of DA, PCE10-2F, PM6, Y5, Y6 and L8-BO films with water and ethylene glycol droplet on top.

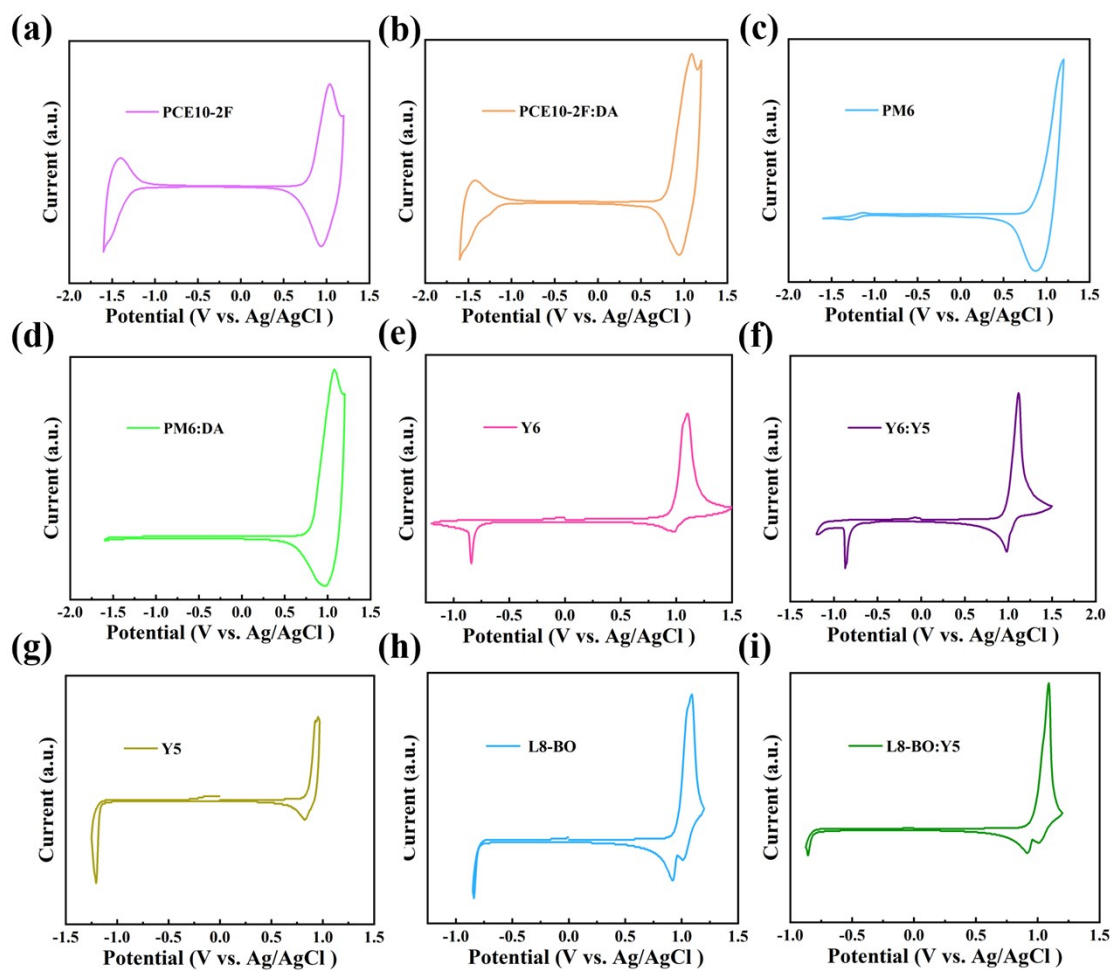

**Figure S2.** (a-i) CV curves of PCE10-2F, PCE10-2F:DA, PM6, PM6:DA, Y6, Y5, Y6:Y5, L8-BO and L8-BO:Y5 blend films.

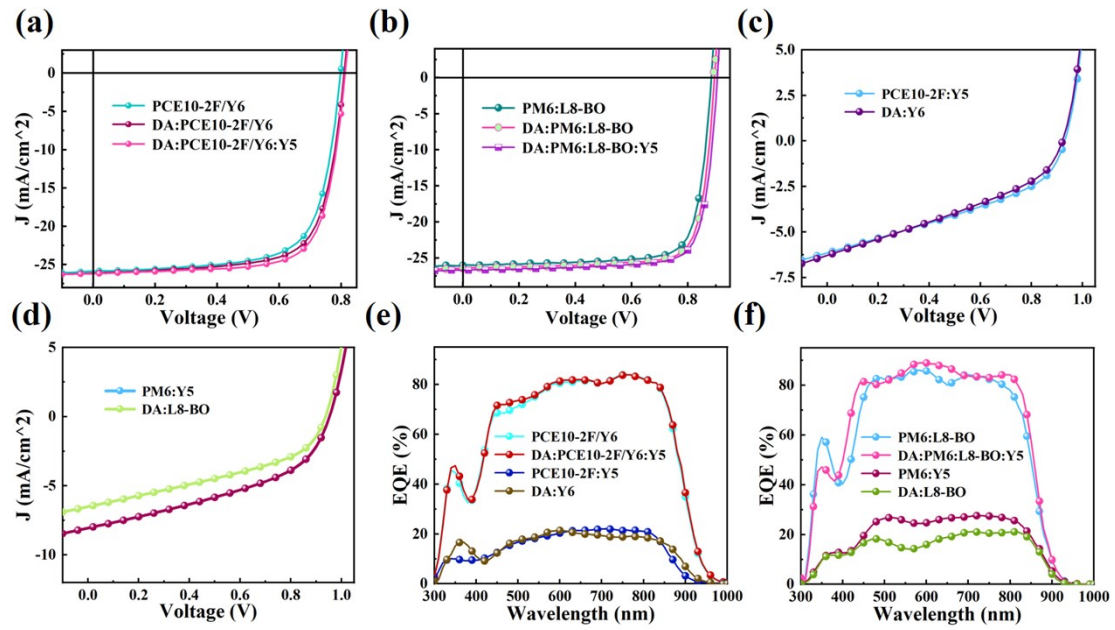

**Figure S3.** (a) J-V curves of PCE10-2F/Y6, DA: PCE10-2F/Y6 and DA: PCE10-2F/Y6:Y5-based OSC devices. (b) J-V curves of PM6:L8-BO, DA PM6:L8-BO and DA: PM6:L8-BO:Y5-based OSC devices. (c) J-V curves of PCE10-2F:Y5, DA:Y6-based OSC devices. (d) J-V curves of PM6:Y5, DA:L8-BO-based OSC devices. (e) EQE curves of PCE10-2F/Y6, DA: PCE10-2F/Y6:Y5, PCE10-2F:Y5 and DA:Y6-based OSC devices. (f) EQE curves of PM6:L8-BO, DA: PM6:L8-BO:Y5, PM6:Y5 and DA:L8-BO -based OSC devices.

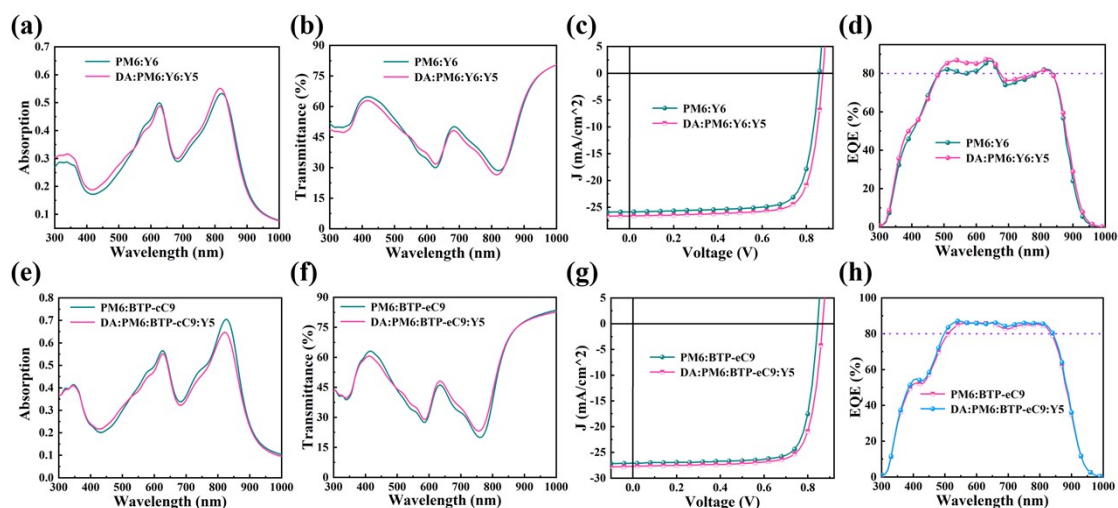

**Figure S4.** (a) Absorption spectra and (b) transmittance spectra of PM6:Y6, DA:PM6:Y6:Y5 blend films. (c)  $J$ - $V$  and (d) EQE curves of PM6:Y6 and DA:PM6:Y6:Y5-based OSC devices. (e) Absorption spectra and (f) transmittance spectra of PM6:BTP-eC9, DA:PM6:BTP-eC9:Y5 blend films. (g)  $J$ - $V$  and (h) EQE curves of PM6:BTP-eC9, DA:PM6:BTP-eC9:Y5-based OSC devices.



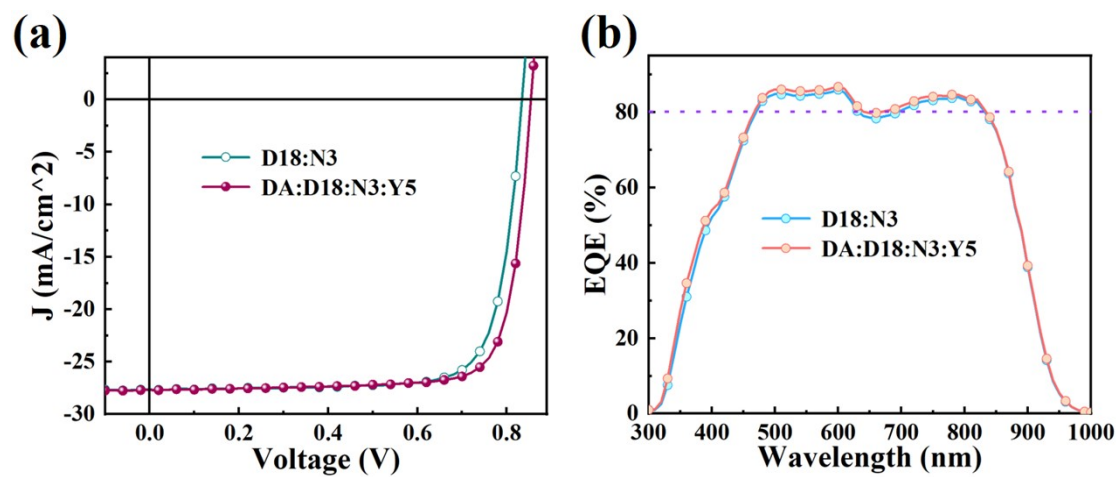

**Figure S5.** (a)  $J$ - $V$  and (b) EQE curves of D18/N3, DA: D18/N3:Y5-based OSC devices.

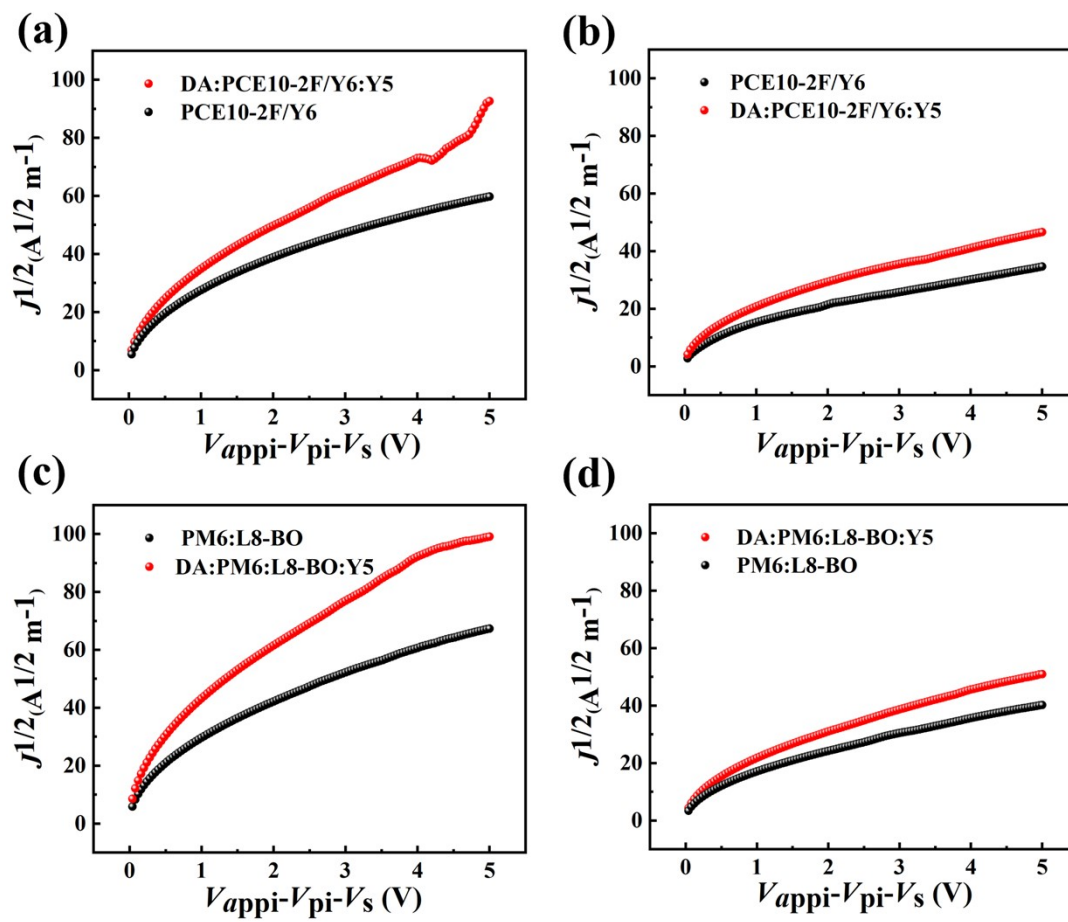

**Figure S6.**  $J^{1/2}$ - $V$  plots of hole-only devices and  $J^{1/2}$ - $V$  plots of electron-only devices (in dark).

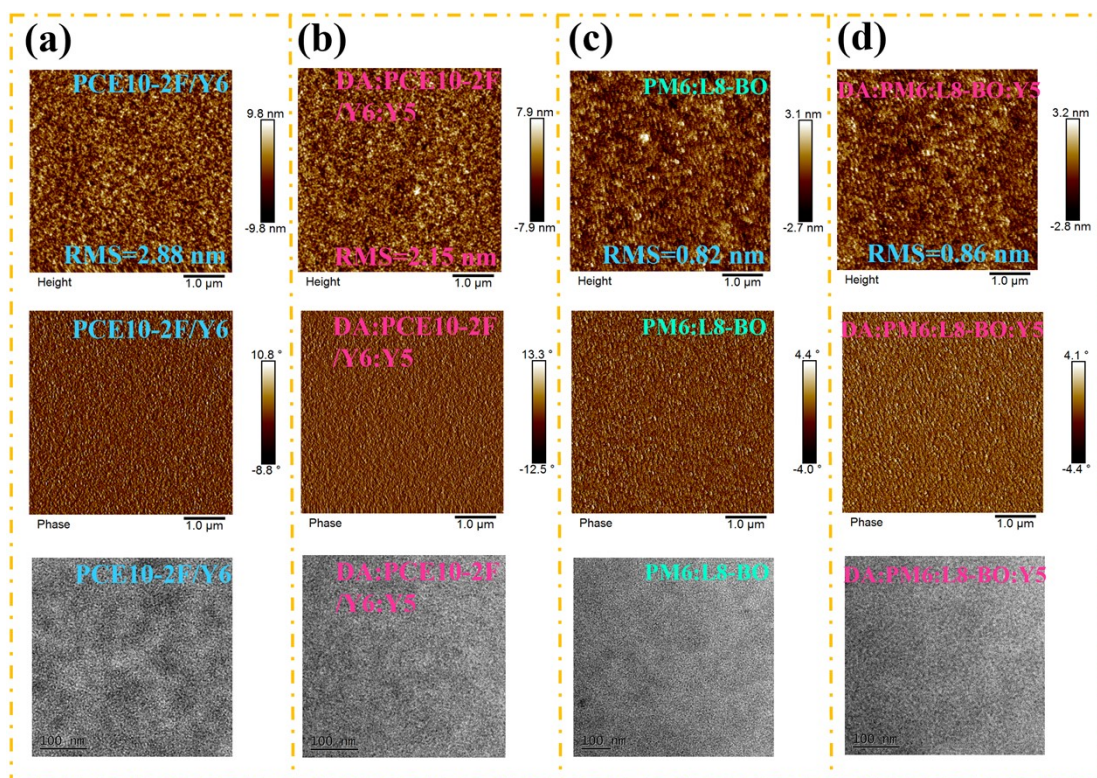

**Figure S7.** AFM and TEM images of optimized WBG system blend films.

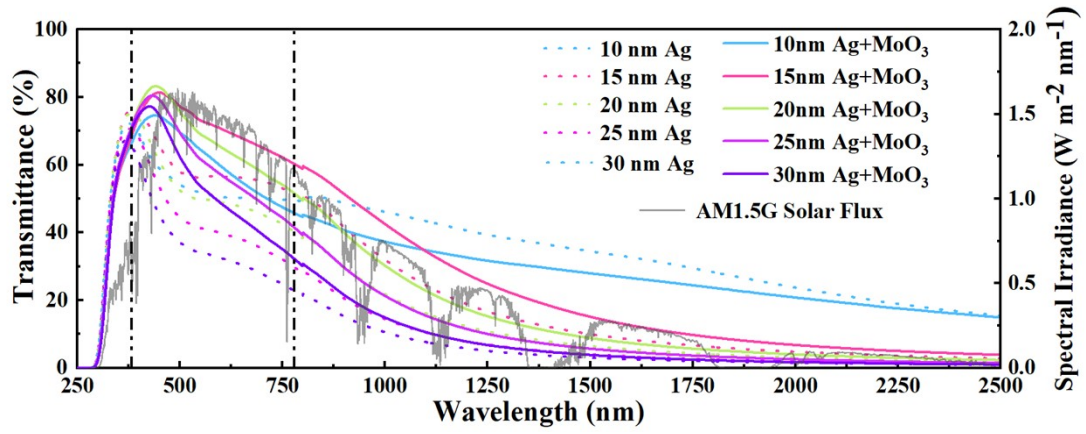

**Figure S8.** (a) Transmittance of 10 nm, 15 nm, 20 nm, 25 nm, 30 nm Ag thickness back electrode (ITO/Glass/PDINN/Ag/with or without MoO<sub>3</sub>).

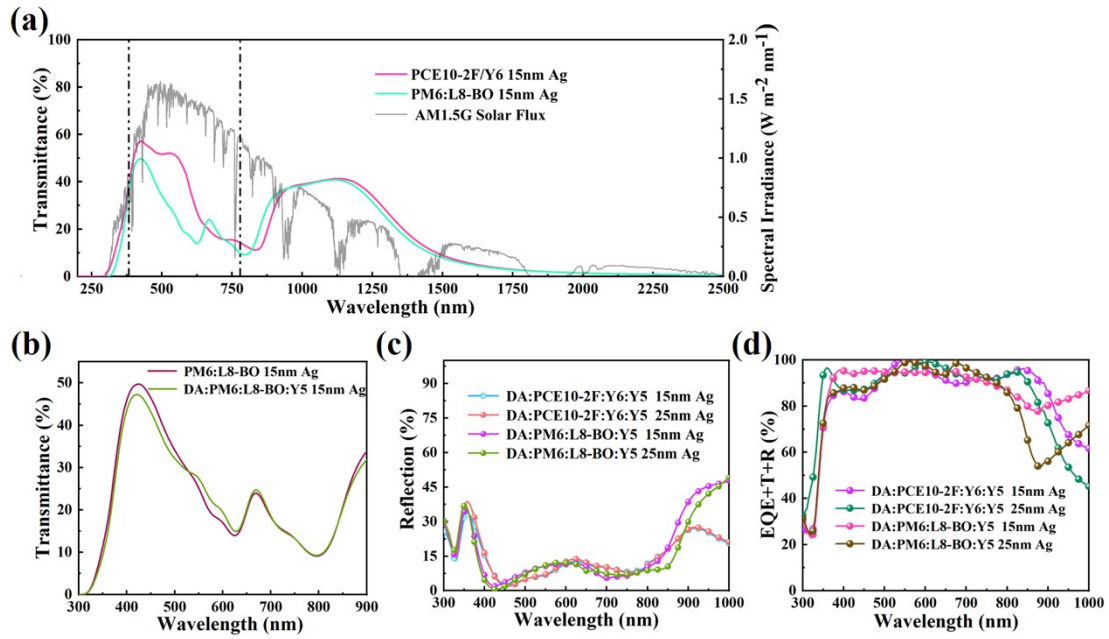

**Figure S9.** (a-b) Transmittance spectra of PCE10-2F/Y6, PM6:L8-BO and DA:PM6:L8-BO:Y5-based ST-OSCs. (c-d) The reflectance spectra and photon balance check spectra ( $\text{EQE}(\lambda)\% + \text{T}(\lambda)\% + \text{R}(\lambda)\%$ ) spectra of ST-OSCs.

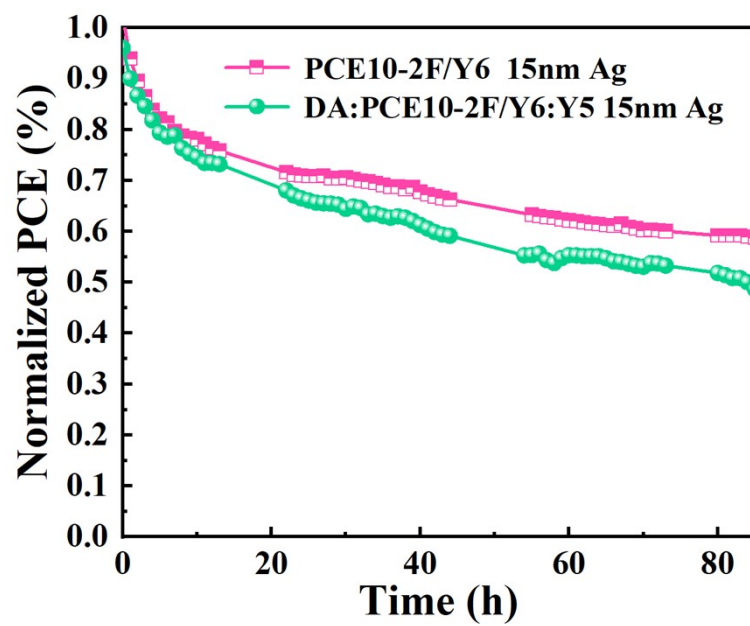

**Figure S10.** Stability of ST-OSCs under AM 1.5G 100 mW cm<sup>-2</sup> simulated sunlight continuous illumination with 1h intervals for data collection.

**Table S1.** Photovoltaic performance of binary and multi-component OSCs with different DA and Y5 ratio.

| Device                   | D/A                   | $V_{oc}$ (V) | $J_{sc}$ (mA/ cm <sup>2</sup> ) | FF (%) | PCE (%) |
|--------------------------|-----------------------|--------------|---------------------------------|--------|---------|
| <b>PCE10-2F/Y6</b>       | 60/40nm               | 0.796        | 25.87                           | 70.56  | 14.55   |
| <b>PCE10-2F/Y5</b>       | 60/40nm               | 0.930        | 6.14                            | 38.20  | 2.17    |
| <b>DA/Y6</b>             | 60/40nm               | 0.921        | 6.28                            | 35.62  | 2.05    |
| <b>DA:PCE10-2F/Y6</b>    | 0.1:1, 60/40nm        | 0.801        | 25.92                           | 70.70  | 14.68   |
|                          | 0.2:1, 60/40nm        | 0.808        | 26.13                           | 71.40  | 15.11   |
|                          | 0.3:1, 60/40nm        | 0.811        | 25.77                           | 69.23  | 14.47   |
| <b>PCE10-2F/Y6:Y5</b>    | 60/40nm, 1:0.1        | 0.803        | 26.04                           | 70.98  | 14.84   |
| <b>DA:PCE10-2F/Y6:Y5</b> | 0.2:1,60/40nm,1:0.05  | 0.808        | 25.99                           | 73.88  | 15.51   |
|                          | 0.2:1,60/40nm, 1:0.1  | 0.812        | 26.20                           | 73.22  | 15.57   |
|                          | 0.2:1,60/40nm, 1:0.15 | 0.816        | 25.37                           | 70.42  | 14.58   |
| <b>PM6:L8-BO</b>         | 1:1.2                 | 0.880        | 25.96                           | 78.79  | 18.01   |
| <b>PM6:Y5</b>            | 1:1.2                 | 0.952        | 8.05                            | 42.76  | 3.27    |
| <b>DA:L8-BO</b>          | 1:1.2                 | 0.937        | 6.51                            | 40.54  | 2.46    |
| <b>DA:PM6:L8-BO</b>      | 0.15:1:1.2            | 0.888        | 26.14                           | 79.89  | 18.54   |
|                          | 0.25:1:1.2            | 0.892        | 26.44                           | 79.41  | 18.74   |
|                          | 0.35:1:1.2            | 0.895        | 25.79                           | 78.34  | 18.08   |
| <b>PM6:L8-BO:Y5</b>      | 1:1.2:0.1             | 0.888        | 26.11                           | 79.08  | 18.34   |
| <b>DA:PM6:L8-BO:Y5</b>   | 0.25:1:1.2:0.1        | 0.903        | 26.69                           | 79.18  | 19.09   |

**Table S2.** Operating characteristics of opaque devices under simulated AM 1.5G, 100 mW cm<sup>-2</sup> illumination.

| Devices                   | D/A                   | $V_{oc}$<br>(V) | $J_{sc}$<br>(mA/<br>cm <sup>2</sup> ) | $J_{sc}$                                    | FF<br>(%) | PCE <sup>(b)</sup><br>(%) | AVT                          |
|---------------------------|-----------------------|-----------------|---------------------------------------|---------------------------------------------|-----------|---------------------------|------------------------------|
|                           |                       |                 |                                       | $_{cal}^{(a)}$<br>(mA/<br>cm <sup>2</sup> ) |           |                           | of<br>active<br>layer<br>(%) |
| <b>PM6:Y6</b>             | 1:1.2                 | 0.859           | 25.86                                 | 25.09                                       | 77.05     | 17.12(16.93)              | 38.84                        |
| <b>DA: PM6:Y6:Y5</b>      | 0.25:1:1.2:0.1        | 0.874           | 26.63                                 | 25.84                                       | 77.62     | 18.08(17.79)              | 40.40                        |
| <b>PM6:BTP-eC9</b>        | 1:1.2                 | 0.843           | 27.11                                 | 26.20                                       | 78.74     | 18.00(17.83)              | 36.11                        |
| <b>DA: PM6:BTP-eC9:Y5</b> | 0.25:1:1.2:0.1        | 0.865           | 27.71                                 | 26.59                                       | 78.11     | 18.72(18.59)              | 37.82                        |
| <b>D18:N3</b>             | 60 nm/45 nm           | 0.832           | 27.66                                 | 26.37                                       | 78.14     | 17.98(17.69)              | 35.23                        |
| <b>DA:D18:N3:Y5</b>       | 0.2:1,60nm/1:0.1,45nm | 0.853           | 27.70                                 | 26.45                                       | 79.67     | 18.80(18.66)              | 36.07                        |



**Table S3.** Hole and electron mobilities of PCE10-2F/Y6, DA:PCE10-2F/Y6:Y5, PM6:L8-BO and DA:PM6:L8-BO:Y5 devices in the dark.

| Device            | $\mu_h(\text{cm}^2 \text{V}^{-1} \text{s}^{-1})$ | $\mu_e(\text{cm}^2 \text{V}^{-1} \text{s}^{-1})$ | $\mu_h/\mu_e$ |
|-------------------|--------------------------------------------------|--------------------------------------------------|---------------|
| PCE10-2F/Y6       | $8.685 \times 10^{-4}$                           | $8.155 \times 10^{-4}$                           | 1.064         |
| DA:PCE10-2F/Y6:Y5 | $9.008 \times 10^{-4}$                           | $8.805 \times 10^{-4}$                           | 1.023         |
| PM6:L8-BO         | $8.945 \times 10^{-4}$                           | $8.559 \times 10^{-4}$                           | 1.045         |
| DA:PM6:L8-BO:Y5   | $9.145 \times 10^{-4}$                           | $8.948 \times 10^{-4}$                           | 1.022         |

**Table S4.** Summarized parameters for the ordering structures of neat films and blend films.

| Film              | Out-of-Plane                           |                            |                            |                                   | In-Plane                  |                            |                            |                                   |
|-------------------|----------------------------------------|----------------------------|----------------------------|-----------------------------------|---------------------------|----------------------------|----------------------------|-----------------------------------|
|                   | $\pi$ - $\pi$ stacking cell axis (010) |                            |                            |                                   | Unit cell long axis (100) |                            |                            |                                   |
|                   | q ( $\text{\AA}^{-1}$ )                | d-spacing ( $\text{\AA}$ ) | FWHM ( $\text{\AA}^{-1}$ ) | Coherence length ( $\text{\AA}$ ) | q ( $\text{\AA}^{-1}$ )   | d-spacing ( $\text{\AA}$ ) | FWHM ( $\text{\AA}^{-1}$ ) | Coherence length ( $\text{\AA}$ ) |
| PCE10-2F          | 1.606                                  | 3.910                      | 0.278                      | 20.5                              | 0.262                     | 24                         | 0.1                        | 56.3                              |
| PCE10-2F:DA       | 1.631                                  | 3.850                      | 0.43                       | 23.5                              | 0.270                     | 23.3                       | 0.083                      | 68.5                              |
| Y6                | 1.731                                  | 3.627                      | 0.155                      | 36.8                              | 0.273                     | 23                         | 0.07                       | 80.8                              |
| Y6:Y5             | 1.738                                  | 3.613                      | 0.176                      | 32.5                              | 0.276                     | 22.7                       | 0.082                      | 69.4                              |
| PCE10-2F/Y6       | 1.691                                  | 3.714                      | 0.144                      | 39.8                              | 0.298                     | 21.1                       | 0.041                      | 136.8                             |
| DA:PCE10-2F/Y6:Y5 | 1.637                                  | 3.562                      | 0.250                      | 22.9                              | 0.301                     | 20.9                       | 0.057                      | 70.4                              |
| PM6               | 1.653                                  | 3.799                      | 0.294                      | 19.4                              | 0.285                     | 22.0                       | 0.089                      | 63.3                              |
| PM6:DA            | 1.721                                  | 3.649                      | 0.187                      | 30.6                              | 0.299                     | 21                         | 0.054                      | 104.4                             |
| PM6:L8-BO         | 1.702                                  | 3.690                      | 0.164                      | 34.8                              | 0.270                     | 23.3                       | 0.066                      | 85.6                              |
| DA:PM6:L8-BO:Y5   | 1.713                                  | 3.666                      | 0.188                      | 30.4                              | 0.272                     | 23.1                       | 0.069                      | 82.5                              |

**Table S5.** Detailed parameters of silver electrodes with different thickness.

| <b>Electrode</b> | <b>AVT (%)</b> | <b>IRR (%)</b> | <b>Sheet resistance (<math>\Omega</math>)</b> |
|------------------|----------------|----------------|-----------------------------------------------|
| <b>100nm Ag</b>  | 0              | 100            | 1.58                                          |
| <b>10nm Ag</b>   | 63.66          | 65.22          | 6.89                                          |
| <b>15nm Ag</b>   | 73.16          | 64.62          | 2.74                                          |
| <b>20nm Ag</b>   | 69.10          | 73.78          | 2.50                                          |
| <b>25nm Ag</b>   | 61.71          | 80.81          | 2.32                                          |
| <b>30nm Ag</b>   | 53.77          | 86.10          | 1.96                                          |

**Table S6.** Detailed parameter on state-of-the-art ST-OSC devices without complex optical engineering reported in the literatures.

| Acytive layer                      | PCE (%) | AVT (%) | LUE (%) | Reference |
|------------------------------------|---------|---------|---------|-----------|
| DA:PCE10-2F/Y6:Y5                  | 12.95   | 31.35   | 4.06    | This work |
| DA:PCE10-2F/Y6:Y5                  | 11.18   | 45.61   | 5.10    | This work |
| DA:PM6:L8-BO:Y5                    | 13.56   | 25.08   | 3.44    | This work |
| PM6:BTP-eC9:L8-BO                  | 11.44   | 46.79   | 5.35    | 1         |
| PCE-10:A078                        | 10.8    | 45.7    | 5.0     | 2         |
| PBDB-TF:L8-BO:BTP-eC9              | 12.95   | 38.67   | 5.0     | 3         |
| PTB7-Th: H3                        | 8.38    | 50.9    | 4.27    | 4         |
| PTB7-Th: FOIC: PC <sub>71</sub> BM | 8.66    | 50.04   | 4.33    | 5         |
| PL-Cl: F8IC                        | 11.0    | 35.0    | 3.85    | 6         |
| PTB7-Th: FOIC                      | 10.3    | 37.4    | 3.85    | 7         |
| PBT1-C-2Cl: Y6                     | 9.1     | 40.1    | 3.65    | 8         |
| PCE-10: BT-CIC: TT-FIC             | 8.0     | 44.2    | 3.54    | 9         |
| PTB7-Th: IEICO-4Cl                 | 8.38    | 25.7    | 2.15    | 10        |
| PTB7-Th: IUIC                      | 10.2    | 31      | 3.16    | 11        |
| PCE-10: BT-CIC                     | 7.1     | 43      | 3.05    | 12        |
| PTB7-Th: ATT-2                     | 7.7     | 37      | 2.85    | 13        |
| PBDB-T: ITIC                       | 7.3     | 25.2    | 1.84    | 14        |
| PTB7-Th: IHIC                      | 9.77    | 36      | 3.52    | 15        |
| PTB7-Th: COi8DFIC: IEICO-4F        | 8.23    | 20.78   | 1.71    | 16        |

|                               |       |       |      |    |
|-------------------------------|-------|-------|------|----|
| PBDTTT-ET: IEICO              | 6.8   | 25.1  | 1.71 | 17 |
| PTB7-Th: PBT1-S: PC71BM       | 9.2   | 20    | 1.84 | 18 |
| PBDB-T-2F: Y6                 | 12.88 | 25.6  | 3.30 | 19 |
| PTB7-Th: ACS8                 | 11.1  | 28.6  | 3.17 | 20 |
| PTB7-Th: BDTThIT-4F: IEICO-4F | 9.40  | 24.6  | 2.31 | 21 |
| PTB7-Th: IEICO-4F             | 9.06  | 27.1  | 2.46 | 22 |
| PTB7-Th: IEICO-4F             | 10.03 | 34.2  | 3.43 | 23 |
| PBDB-T: Y14                   | 12.67 | 23.69 | 3.00 | 24 |
| PBFTT: IT-4Cl                 | 9.1   | 27.6  | 2.51 | 25 |
| PFTzTT3TC: ITIC               | 6.43  | 26.77 | 1.72 | 26 |
| PBN-S: IT-4F                  | 9.83  | 32    | 3.15 | 27 |
| PTB7-Th: IEICO-4F             | 10.83 | 29.5  | 3.19 | 28 |
| PDTP-DFBT: FOIC               | 4.2   | 52    | 2.18 | 29 |
| J71:PTB7-Th: IHIC             | 9.3   | 21.4  | 2.01 | 30 |
| DTG-IW: PTB7-Th               | 6.19  | 50.4  | 3.12 | 31 |
| PM6: Y6: PC71BM               | 10.2  | 28.6  | 2.92 | 32 |
| PBDB-TF: Y6: BTTPC            | 13.1  | 22.35 | 2.93 | 33 |
| PBDB-TF: Y6: DTNIF            | 13.49 | 22.58 | 3.05 | 34 |
| PBDB-TF: Y6: PC71BM           | 13    | 21.4  | 2.78 | 35 |
| PCE10: ICBA:Y8                | 10.46 | 26.56 | 2.78 | 36 |
| D18-Cl: Y6-1O: Y6             | 13.02 | 20.2  | 2.63 | 37 |

|                          |       |       |      |    |
|--------------------------|-------|-------|------|----|
| PCE10-2Cl: IT-4F         | 8.25  | 33    | 2.72 | 38 |
| PM2: Y6-BO               | 5.9   | 43.3  | 2.55 | 39 |
| PM6: Y6: DIBC            | 14.00 | 21.60 | 3.02 | 40 |
| PM6: Y6                  | 9.7   | 42.82 | 4.15 | 41 |
| PCE10-BDT2F-0.8: Y6      | 10.85 | 41.08 | 4.46 | 42 |
| PTB7-Th: ATT-9           | 9.37  | 35.5  | 3.33 | 43 |
| PM6-Ir1: BTP-eC9: PC71BM | 14.09 | 20.44 | 2.82 | 44 |

**Table S7.** Detailed parameter on state-of-the-art multifunctional ST-OSC devices reported in the literatures.

| Device structure                                         | PCE (%) | AVT (%) | LUE (%) | IRR (%) | Reference |
|----------------------------------------------------------|---------|---------|---------|---------|-----------|
| ITO/PEDOT:PSS/active layer/PDINN/ Ag /MoO3               | 12.83   | 31.35   | 4.02    | 90      | 45        |
| ITO/PEDOT:PSS-TA/active layer/Bis-FIMG/ultrathin Ag /DBR | 11.18   | 32.07   | 3.58    | 90      | 46        |
| ITO/PEDOT:PSS/active layer/PDINN/Ag                      | 9.37    | 35.5    | 3.33    | 84.3    | 47        |
| ITO/PEDOT:PSS/active layer/PFN-Br/Ag /DBR                | 12.3    | 23.45   | 2.88    | 90      | 48        |
| ITO/PEDOT:PSS/active layer/PFN-Br/Ag /DBR                | 8.4     | 22.8    | 1.92    | 83.1    | 49        |
| ITO/PEDOT:PSS/active layer/PFN-Br/Ag /DBR                | 7.3     | 29.5    | 2.15    | 93.1    | 55        |

## REFERENCES

- [1] X. Liu, Z. Zhong, R. Zhu, J. Yu and G. Li, *Joule*, 2022, **6**, 1–13.
- [2] Y. Li, X. Guo, Z. Peng, B. Qu, H. Yan, H. Ade, M. Zhang and S. R. Forrest, *P.N.A.S.* 2020, **117**, 21147.
- [3] S. Guan, Y. Li, K. Yan, W. Fu, L. Zuo and H. Chen, *Adv. Mater.*,

<https://doi.org/10.1002/adma.202205844>.

[4] Y. Li, C. He, L. Zuo, F. Zhao, L. Zhan, X. Li, R. Xia, H.L. Yip, Li, C.Z., X. Liu, and H. Chen, *Adv. Energy Mater.*, 2021, **11**, 2003408.

W. Li, M. Chen, J. Cai, E. L.K. Spooner, H. Zhang, R. S. Gurney, D. Liu, Z. Xiao, D. G. Lidzey, L. Ding and T. Wang, *Joule*, 2019, **3**, 819-833.

[5] Q. Liu, L.G. Gerling, F. Bernal-Texca, J. Toudert, T. Li, X. Zhan, and J. Martorell, *Adv. Energy Mater.*, 2020, **10**, 1904196.

[6] Y. Chang, X. Zhu, L. Zhu, Y. Wang, C. Yang, X. Gu, Y. Zhang, J. Zhang, K. Lu, X. Sun and Z. Wei, *Nano Energy*, 2021, **86**, 106098.

[7] T. Li, S. Dai, Z. Ke, L. Yang, J. Wang, C. Yan, W. Ma, and X. Zhan, *Adv. Mater.* 2018, **30**, 1705969.

[8] Y. Xie, Y. Cai, L. Zhu, R. Xia, L. Ye, X. Feng, H.L. Yip, F. Liu, G. Lu, S. Tan, and Y. Sun, *Adv. Funct. Mater.*, 2020, **30**, 2002181.

[9] Y. Li, C. Ji, Y. Qu, X. Huang, S. Hou, C.Z. Li, L.S. Liao, L.J. Guo and S.R. Forrest, *Adv. Mater.*, 2019, **31**, 1903173.

[10] Y. Cui, C. Yang, H. Yao, J. Zhu, Y. Wang, G. Jia, F. Gao and J. Hou, *Adv. Mater.*, 2017, **29**, 1703080. 2.

[11] B. Jia, S. Dai, Z. Ke, C. Yan, W. Ma and X. Zhan, *Chem. Mater.*, 2017, **30**, 239-245.

[12] Y. Li, J.D. Lin, X. Che, Y. Qu, F. Liu, L.S. Liao and S.R. Forrest, *J. Am. Chem. Soc.*, 2017, **139**, 17114-17119.

[13] F. Liu, Z. Zhou, C. Zhang, J. Zhang, Q. Hu, T. Vergote, F. Liu, T.P. Russell, and



- X. Zhu, *Adv. Mater.*, 2017, **29**, 1606574.
- [14] M.B. Upama, M. Wright, N.K. Elumalai, M.A. Mahmud, D. Wang, C. Xu and A. Uddin, *ACS Photonics*, 2017, **4**, 2327-2334.
- [15] W. Wang, C. Yan, T.K. Lau, J. Wang, K. Liu, Y. Fan, X. Lu and X. Zhan, *Adv. Mater.*, 2017, **29**, 1701308.
- [16] X. Ma, Z. Xiao, Q. An, M. Zhang, Z. Hu, J. Wang, L. Ding and F. Zhang, *J. Mater. Chem. A*, 2018, **6**, 21485-21492.
- [17] C. Sun, R. Xia, H. Shi, H. Yao, X. Liu, J. Hou, F. Huang, H.-L. Yip and Y. Cao, *Joule*, 2018, **2**, 1816-1826.
- [18] Y. Xie, L. Huo, B. Fan, H. Fu, Y. Cai, L. Zhang, Z. Li, Y. Wang, W. Ma, Y. Chen, and Y. Sun, *Adv. Funct. Mater.* 2018, **28**, 1800627.
- [19] X. Song, N. Gasparini, L. Ye, H. Yao, J. Hou, H. Ade and D. Baran, *ACS Energy Lett.*, 2018, **3**, 669-676.
- [20] J. Wang, J. Zhang, Y. Xiao, T. Xiao, R. Zhu, C. Yan, Y. Fu, G. Lu, X. Lu, S. R. Marder and X. Zhan, *J. A. C. S.*, 2018, **140**, 9140-9147.
- [21] Y. Bai, C. Zhao, X. Chen, S. Zhang, S. Zhang, T. Hayat, A. Alsaedi, Z.a. Tan, J. Hou and Y. Li, *J. Mater. Chem. A*, 2019, **7**, 15887-15894.
- [22] Z. Hu, Z. Wang and F. Zhang, *J. Mater. Chem. A*, 2019, **7**, 7025-7032.
- [23] Y. Liu, P. Cheng, T. Li, R. Wang, Y. Li, S.Y. Chang, Y. Zhu, H.W. Cheng, K.H. Wei, X. Zhan, B. Sun and Y. Yang, *ACS Nano*, 2019, **13**, 1071-1077.
- [24] M. Luo, C. Zhao, J. Yuan, J. Hai, F. Cai, Y. Hu, H. Peng, Y. Bai, Z.a. Tan and Y. Zou, *Mater. Chem. Front.*, 2019, **3**, 2483-2490.

- [25] W. Su, Q. Fan, X. Guo, J. Wu, M. Zhang and Y. Li, *Phys. Chem. Chem. Phys.*, 2019, **21**, 10660-10666.
- [26] X. Wang, K. Zhu, X. Jing, Q. Wang, F. Li, L. Yu and M. Sun, *ACS Appl. Energy Mater.*, 2019, **3**, 915-922.
- [27] Y. Wu, H. Yang, Y. Zou, Y. Dong, J. Yuan, C. Cui and Y. Li, *Energy Environ. Sci.*, 2019, **12**, 675-683.
- [28] R. Xia, C.J. Brabec, H.-L. Yip and Y. Cao, *Joule*, 2019, **3**, 2241-2254.
- [29] Y. Xie, R. Xia, T. Li, L. Ye, X. Zhan, H.L. Yip and Y. Sun, *Small Methods*, 2019, **3**, 1900424.
- [30] J. Zhang, G. Xu, F. Tao, G. Zeng, M. Zhang, Y.M. Yang, Y. Li and Y. Li, *Adv. Mater.* 2019, **31**, 1807159.
- [31] Y. Cho, T.H. Lee, S. Jeong, S.Y. Park, B. Lee, J.Y. Kim and C. Yang, *ACS Appl. Energy Mater.* 2020, **3**, 7689-7698.
- [32] B.H. Jiang, H.E. Lee, J.H. Lu, T.H. Tsai, T.S. Shieh, R.J. Jeng and C.P. Chen, *ACS Appl. Mater. Interfaces*, 2020, **12**, 39496-39504.
- [33] D. Wang, R. Qin, G. Zhou, X. Li, R. Xia, Y. Li, L. Zhan, H. Zhu, X. Lu, H.L. Yip, H. Chen, C. Li, *Adv. Mater.*, 2020, **32**, 2001621.
- [34] P. Yin, Z. Yin, Y. Ma and Q. Zheng, *Energy Environ. Sci.*, 2020, **13**, 5177-5185.
- [35] N. Zhang, T. Jiang, C. Guo, L. Qiao, Q. Ji, L. Yin, L. Yu, P. Murto and X. Xu, *Nano Energy*, 2020, **77**, 105111.
- [36] C. Zhu, H. Huang, Z. Jia, F. Cai, J. Li, J. Yuan, L. Meng, H. Peng, Z. Zhang, Y. Zou, and Y Li., *Sol Energy*, 2020, **204**, 660-666.

- [37] Z. Hu, J. Wang, X. Ma, J. Gao, C. Xu, X. Wang, X. Zhang, Z. Wang and F. Zhang, *J. Mater. Chem. A*, 2021, **9**, 6797-6804.
- [38] X. Huang, J. Oh, Y. Cheng, B. Huang, S. Ding, Q. He, F. Wu, C. Yang, L. Chen and Y. Chen, *J. Mater. Chem. A*, 2021, **9**, 5711-5719.
- [39] T. Jiang, G. Zhang, R. Xia, J. Huang, X. Li, M. Wang, H.-L. Yip and Y. Cao, *Mater. Today Energy*, 2021, **21**, 100807.
- [40] X. Lu, L. Cao, X. Du, H. Lin, C. Zheng, Z. Chen, B. Sun and S. Tao, *Adv. Opt. Mater.*, 2021, **9**, 2100064.
- [41] H.I. Jeong, S. Biswas, S.C. Yoon, S.J. Ko, H. Kim and H. Choi, *Adv. Energy Mater.*, 2021, **11**, 2102397
- [42] X. Huang, L. Zhang, Y. Cheng, J. Oh, C. Li, B. Huang, L. Zhao, J. Deng, Y. Zhang, Z. Liu, F. Wu, X. Hu, C. Yang, L. Chen, Y. Chen, *Adv. Funct. Mater.* 2022, **32**, 2108634.
- [43] W. Liu, S. Sun, S. Xu, H. Zhang, Y. Zheng, Z. Wei and X. Zhu *Adv. Mater.*, 2022, **18**, 2200337.
- [44] W. Liu, S. Sun, S. Xu, H. Zhang, Y. Zheng, Z. Wei, and X. Zhu, *Adv. Mater.*, 2022, **34**, 2200337.
- [45] D. Wang, R. Qin, G. Zhou, X. Li, R. Xia, Y. Li, L. Zhan, H. Zhu, X. Lu, H. Yip, H. Chen and C. Li, *Adv. Mater.* **2020**, 32, 2001621.
- [46] W. Liu, S. Sun, S. Xu, H. Zhang, Y. Zheng, Z. Wei and X. Zhu *Adv. Mater.*, 2022, **18**, 2200337.
- [47] C. Sun, R. Xia, H. Shi, H. Yao, X. Liu, J. Hou, F. Huang, H. Yip and Y. Cao.

*Joule*, 2018, **2**, 1816-1826.

[48] D. Wang, Y. Li, G. Zhou, E. Gu, R. Xia, B. Yan, J. Yao, H. Zhu, X. Lu, H. Yip, H. Chen and C. Li, *Energy Environ. Sci.*, 2022, **15**, 2629-2637.

[49] X. Lia, R. Xia, K. Yan, H. Yip, H. Chen, C. Li. *Chinese Chem. Lett.*, 2020, **31**, 1608-1611.
